# Supplementary material for: Multidimensional modular microfluidic system
Source: Royal Society of Chemistry journal article supplement (doi:10.1039/b912295h), 2009-01-01
Supplement: b912295h.pdf [file b912295h.pdf]

## **Supplementary Information**

### **Multidimensional Modular Microfluidic System**

Po Ki Yuen\*, Jody T. Bliss, Christopher C. Thompson and Richard C. Peterson

Science and Technology, Corning Incorporated, Corning, New York 14831-0001

\* Corning Incorporated

Science & Technology

Corning, New York 14831-0001

Phone: (607) 974-9680

Fax: (607) 974-5957

Email: yuenp@corning.com

In this supplementary information, schematic drawings and dimensions of the components used in the study are provided.

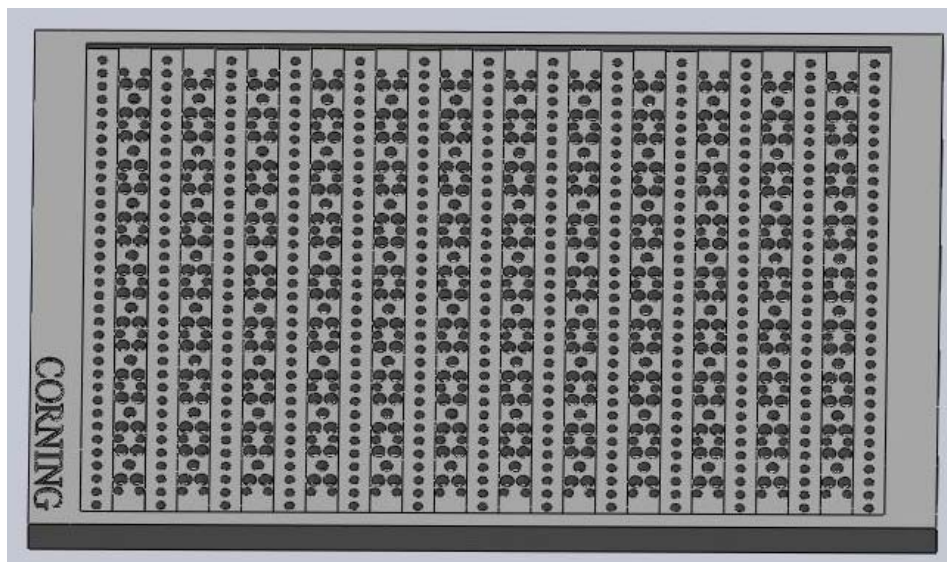

**Figure S1a.** 3D view of the motherboard. The dimensions of the motherboard are 127 mm (width)  $\times$  85 mm (length)  $\times$  6 mm (height).

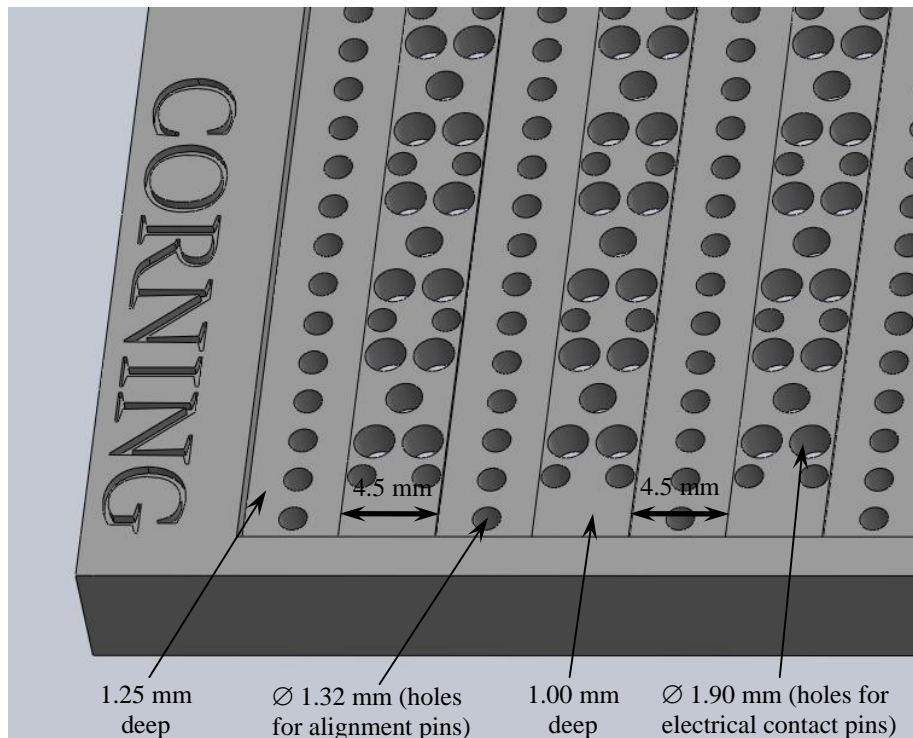

**Figure S1b.** Zoom in 3D view of the motherboard.

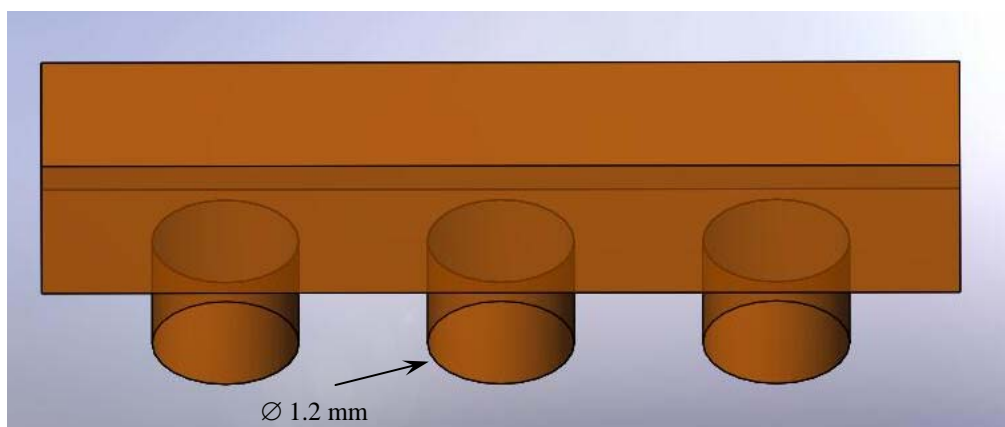

**Figure S2.** 3D view of the alignment pin.

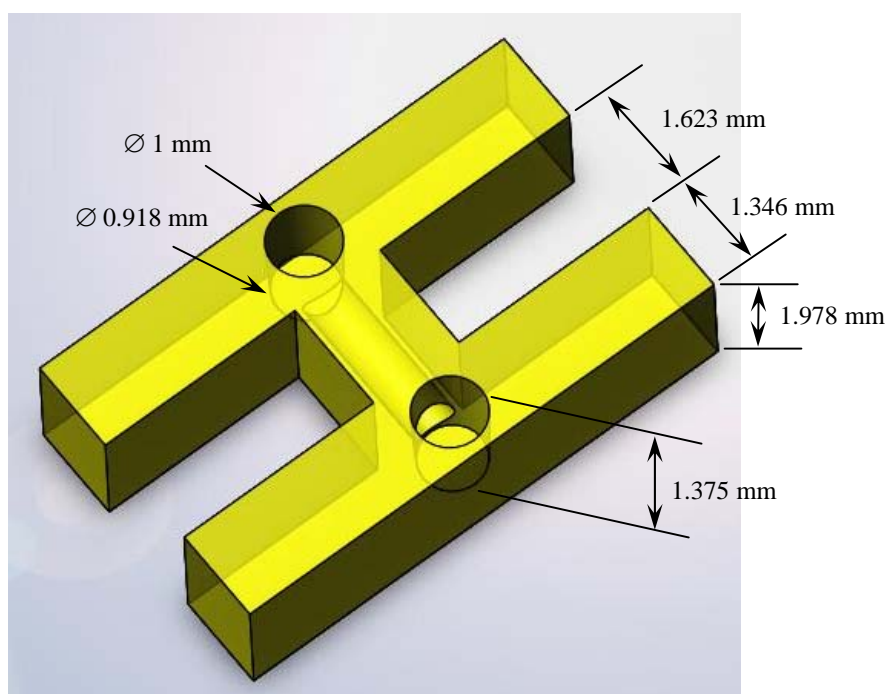

**Figure S3.** 3D view of the H-shaped microchannel insert. The center microchannel is 0.635 mm in diameter. The dimensions of the miniature female luer fitting are the same for every module used in this study.

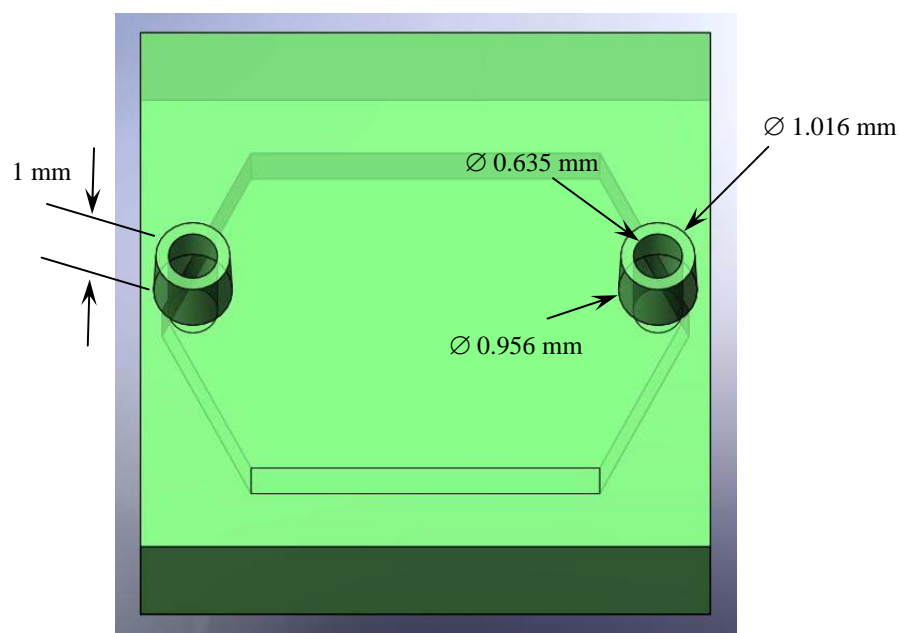

**Figure S4.** 3D view of the small reaction chamber module. The dimensions of the module are 7.5 mm  $\times$  7.5 mm  $\times$  2 mm. The reaction chamber depth is 0.762 mm. The dimensions of the miniature male luer fitting are the same for every module used in this study.

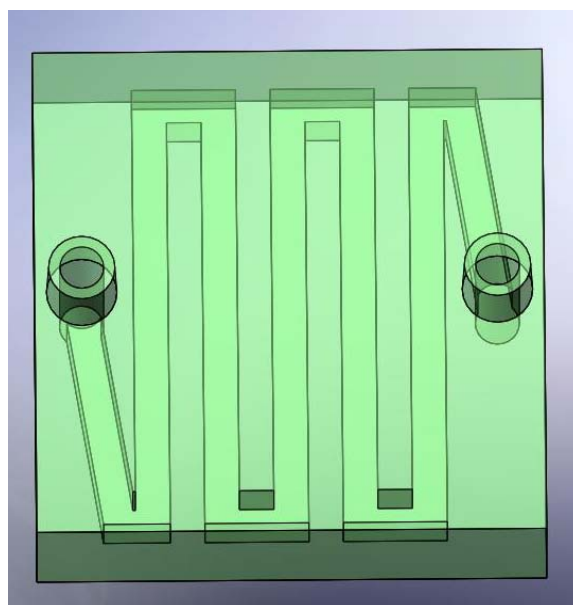

**Figure S5.** 3D view of the small serpentine microchannel module. The dimensions of the module are 7.5 mm  $\times$  7.5 mm  $\times$  2 mm. The square microchannel is 0.762 mm  $\times$  0.762 mm. The dimensions of the miniature male luer fitting are the same as the one depicted in Figure S4.

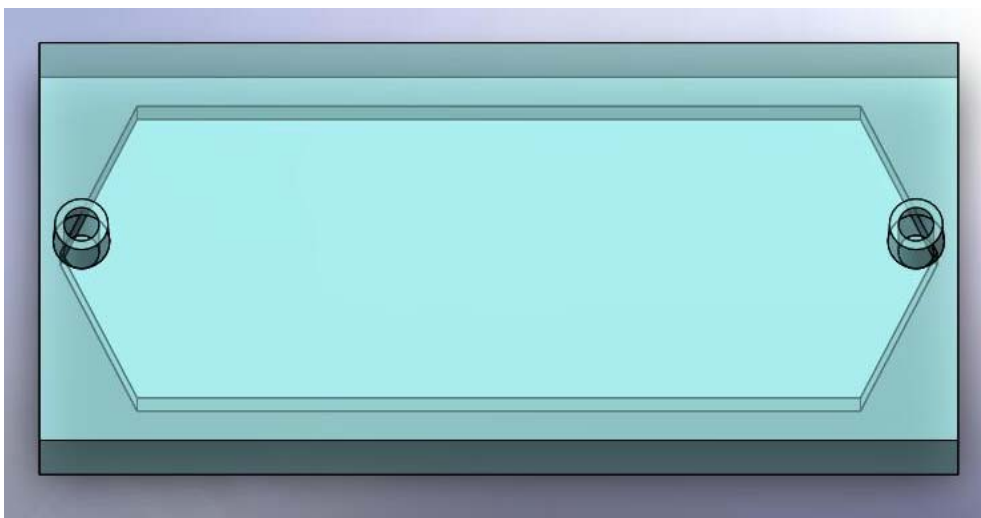

**Figure S6.** 3D view of the long reaction chamber module. The dimensions of the microchip are  $7.5 \text{ mm} \times 16.5 \text{ mm} \times 2 \text{ mm}$ . The reaction chamber depth is  $0.762 \text{ mm}$ . The dimensions of the miniature male luer fitting are the same as the one depicted in Figure S4.

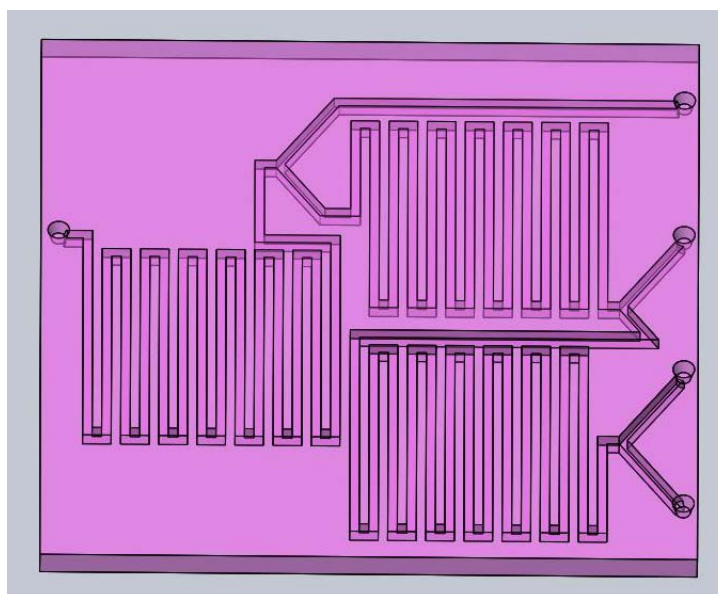

**Figure S7.** 3D view of the large mixer module with four inlets and one outlet. The dimensions of the microchip are  $34.5 \text{ mm} \times 34.5 \text{ mm} \times 2 \text{ mm}$ . The square microchannels are  $0.762 \text{ mm} \times 0.762 \text{ mm}$ . The dimensions of the miniature female luer fitting are the same as the one depicted in Figure S3.

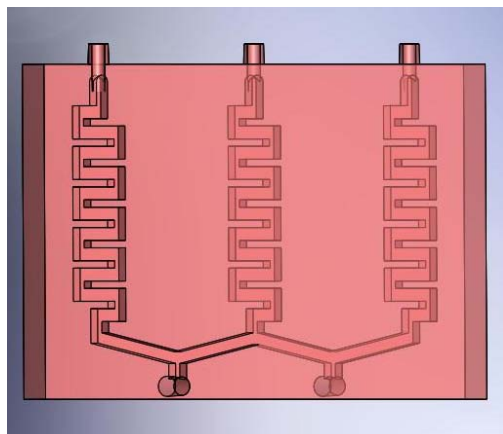

**Figure S8.** 3D view of the two-three flow splitter module. The dimensions of the microchip are 25.5 mm × 16.5 mm × 2 mm. The square microchannels are 0.762 mm × 0.762 mm. The dimensions of the miniature female and male luer fittings are the same as the one depicted in Figures S3 and S4, respectively.

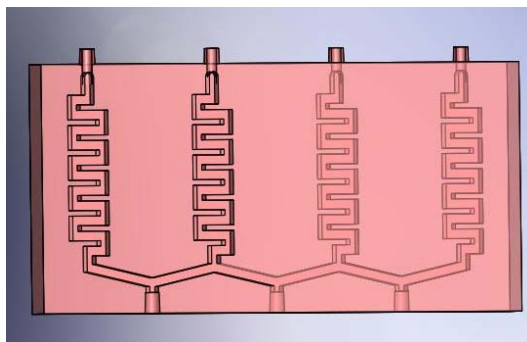

**Figure S9.** 3D view of the three-four flow splitter module. The dimensions of the microchip are 34.5 mm × 16.5 mm × 2 mm. The square microchannels are 0.762 mm × 0.762 mm. The dimensions of the miniature female and male luer fittings are the same as the one depicted in Figures S3 and S4, respectively.

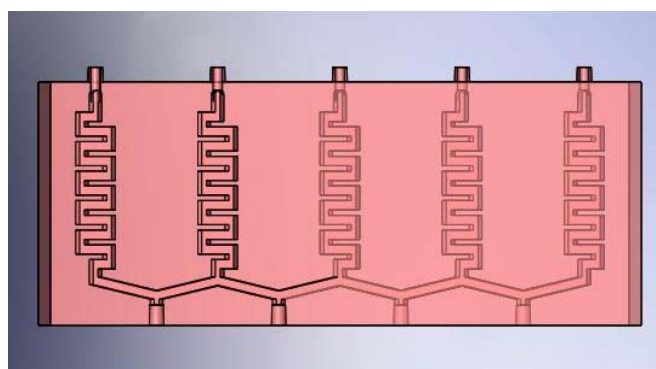

**Figure S10.** 3D view of the four-five flow splitter module. The dimensions of the microchip are 43.5 mm × 16.5 mm × 2 mm. The square microchannels are 0.762 mm × 0.762 mm. The dimensions of the miniature female and male luer fittings are the same as the one depicted in Figures S3 and S4, respectively.

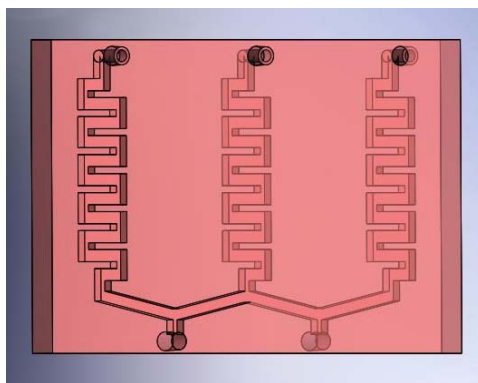

**Figure S11.** 3D view of the two-three flow splitter module. The dimensions of the microchip are 25.5 mm  $\times$  16.5 mm  $\times$  2 mm. The square microchannels are 0.762 mm  $\times$  0.762 mm. The dimensions of the miniature female and male luer fittings are the same as the one depicted in Figures S3 and S4, respectively.

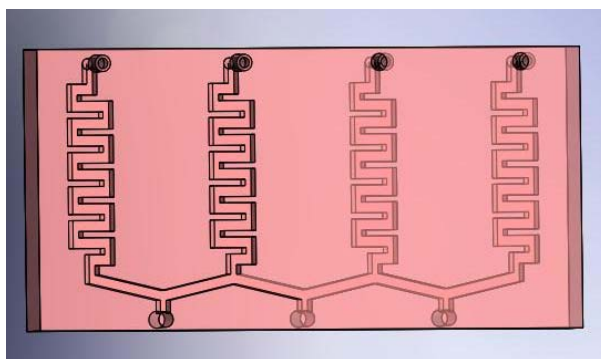

**Figure S12.** 3D view of the three-four flow splitter module. The dimensions of the microchip are 34.5 mm  $\times$  16.5 mm  $\times$  2 mm. The square microchannels are 0.762 mm  $\times$  0.762 mm. The dimensions of the miniature female and male luer fittings are the same as the one depicted in Figures S3 and S4, respectively.

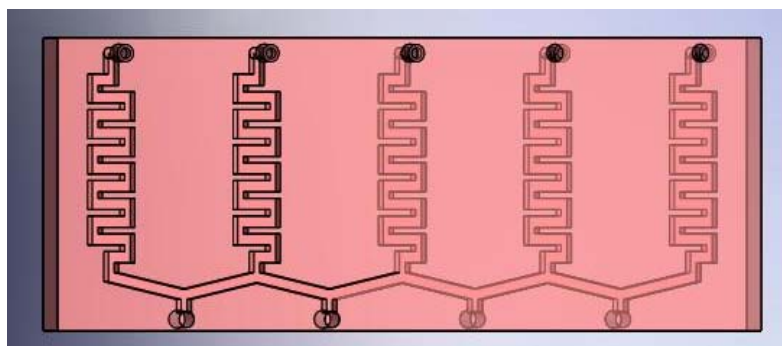

**Figure S13.** 3D view of the four-five flow splitter module. The dimensions of the microchip are 43.5 mm  $\times$  16.5 mm  $\times$  2 mm. The square microchannels are 0.762 mm  $\times$  0.762 mm. The dimensions of the miniature female and male luer fittings are the same as the one depicted in Figures S3 and S4, respectively.



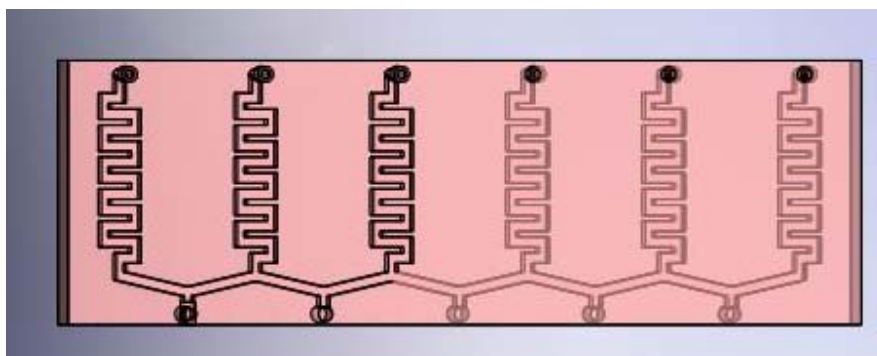

**Figure S14.** 3D view of the five-six flow splitter module. The dimensions of the microchip are 52.5 mm  $\times$  16.5 mm  $\times$  2 mm. The square microchannels are 0.762 mm  $\times$  0.762 mm. The dimensions of the miniature female and male luer fittings are the same as the one depicted in Figures S3 and S4, respectively.

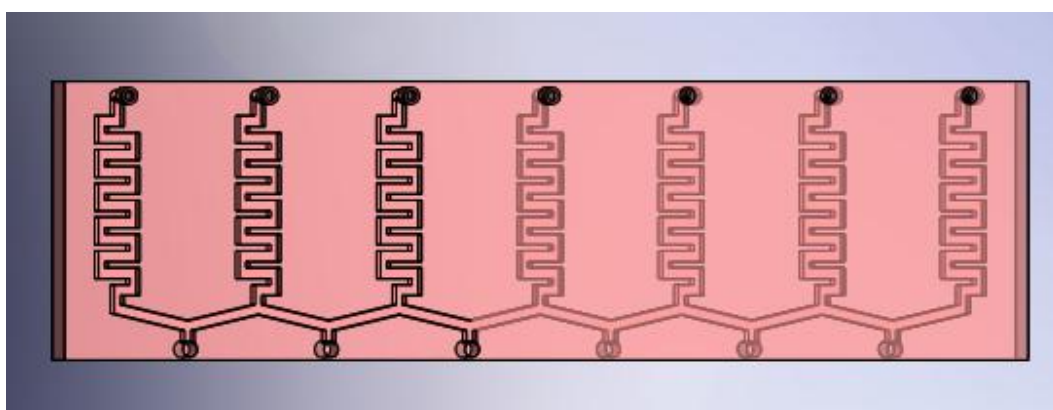

**Figure S15.** 3D view of the six-seven flow splitter module. The dimensions of the microchip are 61.5 mm  $\times$  16.5 mm  $\times$  2 mm. The square microchannels are 0.762 mm  $\times$  0.762 mm. The dimensions of the miniature female and male luer fittings are the same as the one depicted in Figures S3 and S4, respectively.

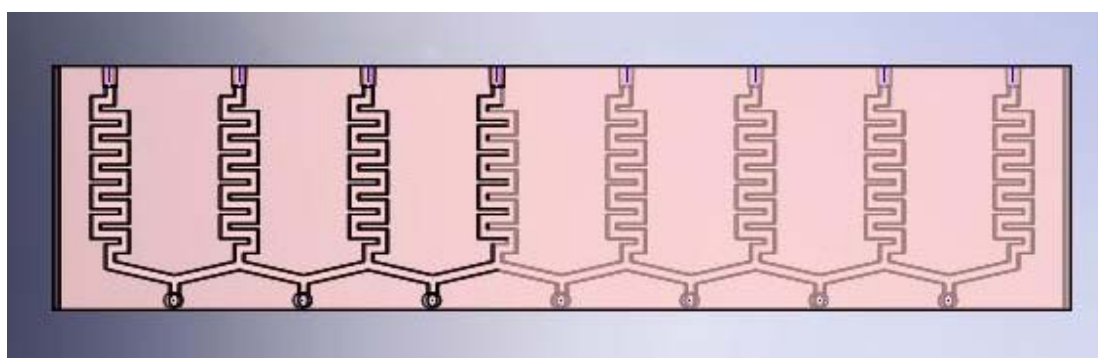

**Figure S16.** 3D view of the seven-eight flow splitter module. The dimensions of the microchip are 70.5 mm  $\times$  16.5 mm  $\times$  2 mm. The square microchannels are 0.762 mm  $\times$  0.762 mm. The dimensions of the miniature female and male luer fittings are the same as the one depicted in Figures S3 and S4, respectively.
